# Supplementary material
Source: ML conference proceedings conference paper supplement (https://proceedings.mlr.press/v216/samplawski23a.html)
Supplement: Supplementary file 1 [file samplawski23a-supp.pdf]

---

# Heteroskedastic Geospatial Tracking with Distributed Camera Networks (Supplementary Material)

---

Colin Samplawski<sup>1</sup> Shiwei Fang<sup>1</sup> Ziqi Wang<sup>2</sup> Deepak Ganesan<sup>1</sup> Mani Srivastava<sup>2</sup> Benjamin M. Marlin<sup>1</sup>

<sup>1</sup>Manning College of Information & Computer Sciences, University of Massachusetts Amherst

<sup>2</sup>University of California, Los Angeles

Table 1: Complete Results

| Lights | Model    | KF Train | Calibration | Detector NLL | Detector OPM | NLL    | OPM   | DetPr | LocA  |
|--------|----------|----------|-------------|--------------|--------------|--------|-------|-------|-------|
| False  | ResNet50 | False    | None        | 11.329       | 0.197        | 19.675 | 0.469 | 0.470 | 0.900 |
| False  | ResNet50 | False    | NLL         | 8.847        | 0.105        | 7.200  | 0.414 | 0.414 | 0.722 |
| False  | ResNet50 | True     | None        | 14.205       | 0.202        | 29.881 | 0.501 | 0.502 | 0.925 |
| False  | ResNet50 | True     | NLL         | 8.823        | 0.100        | 7.360  | 0.398 | 0.396 | 0.709 |
| False  | DETR     | False    | None        | 7.484        | 0.595        | 6.834  | 0.917 | 0.919 | 0.978 |
| False  | DETR     | False    | NLL         | 6.270        | 0.429        | 4.803  | 0.870 | 0.883 | 0.929 |
| False  | DETR     | True     | None        | 8.469        | 0.594        | 7.876  | 0.914 | 0.915 | 0.981 |
| False  | DETR     | True     | NLL         | 6.470        | 0.388        | 5.002  | 0.853 | 0.867 | 0.918 |
| False  | Ours     | False    | None        | 17.489       | 0.308        | 35.338 | 0.644 | 0.646 | 0.947 |
| False  | Ours     | False    | NLL         | 8.725        | 0.137        | 7.419  | 0.476 | 0.479 | 0.771 |
| False  | Ours     | True     | None        | 22.912       | 0.318        | 48.259 | 0.643 | 0.645 | 0.956 |
| False  | Ours     | True     | NLL         | 8.645        | 0.133        | 7.240  | 0.476 | 0.479 | 0.766 |
| True   | ResNet50 | False    | None        | 6.361        | 0.803        | 6.598  | 0.959 | 0.959 | 0.997 |
| True   | ResNet50 | False    | NLL         | 5.921        | 0.569        | 4.537  | 0.934 | 0.939 | 0.974 |
| True   | ResNet50 | True     | None        | 6.840        | 0.793        | 7.171  | 0.958 | 0.958 | 0.997 |
| True   | ResNet50 | True     | NLL         | 6.000        | 0.559        | 4.510  | 0.936 | 0.942 | 0.975 |
| True   | DETR     | False    | None        | 5.288        | 0.819        | 7.149  | 0.985 | 0.987 | 0.990 |
| True   | DETR     | False    | NLL         | 5.736        | 0.637        | 5.465  | 0.936 | 0.946 | 0.956 |
| True   | DETR     | True     | None        | 5.665        | 0.818        | 8.842  | 0.989 | 0.991 | 0.991 |
| True   | DETR     | True     | NLL         | 5.870        | 0.617        | 5.980  | 0.925 | 0.937 | 0.946 |
| True   | Ours     | False    | None        | 7.873        | 0.701        | 8.624  | 0.958 | 0.960 | 0.993 |
| True   | Ours     | False    | NLL         | 6.449        | 0.457        | 5.364  | 0.879 | 0.890 | 0.939 |
| True   | Ours     | True     | None        | 8.274        | 0.704        | 8.857  | 0.960 | 0.961 | 0.996 |
| True   | Ours     | True     | NLL         | 6.346        | 0.472        | 4.973  | 0.890 | 0.900 | 0.947 |

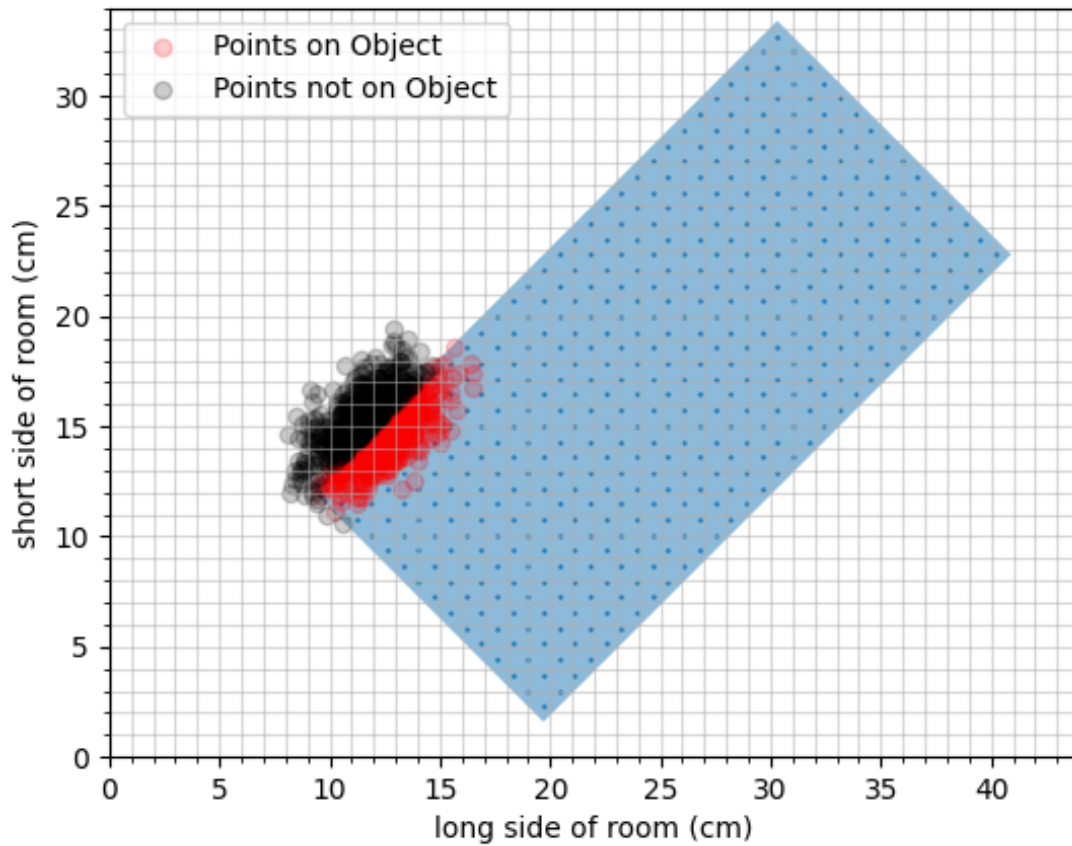

Figure 1: Illustration of the Object Probability Mass (OPM) metric. The blue rectangle represents the physical extent of an object. The black points are sampled points which do not fall inside the spatial extent of the object, while the red points are points that do fall inside the object. The OPM is then the ratio of these two quantities. In this case the  $OPM = 0.52$ . We note that both the object and distributions may not be axis aligned as shown here.
